# Optimization of Spectral Library Size

## Improves DIA-MS Proteome Coverage

Weigang Ge<sup>1,2,3,4#</sup>, Xiao Liang<sup>1,2,3#</sup>, Fangfei Zhang<sup>1,2,3#</sup>, Luang Xu<sup>1,2,3</sup>, Nan Xiang<sup>1,2,3</sup>, Rui Sun<sup>1,2,3</sup>, Wei Liu<sup>1,2,3</sup>, Zhangzhi Xue<sup>1,2,3</sup>, Xiao Yi<sup>1,2,3</sup>, Bo Wang<sup>5</sup>, Jiang Zhu<sup>6</sup>, Cong Lu<sup>6</sup>, Xiaolu Zhan<sup>7</sup>, Lirong Chen<sup>8</sup>, Yan Wu<sup>9,10</sup>, Zhiguo Zheng<sup>11,12</sup>, Wangang Gong<sup>11,12</sup>, Qijun Wu<sup>13</sup>, Jiekai Yu<sup>14</sup>, Zhaoming Ye<sup>9,10</sup>, Xiaodong Teng<sup>5</sup>, Shiang Huang<sup>6</sup>, Shu Zheng<sup>14</sup>, Tong Liu<sup>7\*</sup>, Chunhui Yuan<sup>1,2,3\*</sup>, Tiannan Guo<sup>1,2,3\*</sup>

1, Key Laboratory of Structural Biology of Zhejiang Province, School of Life Sciences, Westlake University, Hangzhou, Zhejiang, China.

2, Westlake Laboratory of Life Sciences and Biomedicine, Hangzhou, Zhejiang, China

3, Institute of Basic Medical Sciences, Westlake Institute for Advanced Study, Hangzhou, Zhejiang, China

4, Westlake Omics (Hangzhou) Biotechnology Co.,Ltd. No.1, Yunmeng Road, Cloud Town, Xihu District, Hangzhou 310024, Zhejiang Province, China

5, Department of Pathology, The First Affiliated Hospital of College of Medicine, Zhejiang University, Hangzhou, Zhejiang Province, China

6, Center for Stem Cell Research and Application, Union Hospital, Tongji Medical College, Huazhong University of Science and Technology, Wuhan, Hubei Province, China

7, Harbin Medical University Cancer Hospital, Harbin 150081, China

8, Department of Pathology, The Second Affiliated Hospital of College of Medicine, Zhejiang University, Hangzhou 310009, Zhejiang Province, China

22 9, Department of Orthopaedics, The Second Affiliated Hospital of Zhejiang University School of  
23 Medicine, Hangzhou 310009, Zhejiang Province, China

24 10, Key Laboratory of Motor System Disease Research and Precision Therapy of Zhejiang  
25 Province, Hangzhou 310020, Zhejiang Province, China

26 11, The Cancer Hospital of the University of Chinese Academy of Sciences, Zhejiang Cancer  
27 Hospital, Hangzhou 310022, Zhejiang Province, China

28 12, Institute of Basic Medicine and Cancer (IBMC), Chinese Academy of Sciences, Hangzhou  
29 310022, Zhejiang Province, China

30 13, Department of Clinical Epidemiology, Shengjing Hospital of China Medical University,  
31 Shenyang Province, China

32 14, Cancer Institute, Key Laboratory of Cancer Prevention and Intervention, Ministry of  
33 Education, The Second Affiliated Hospital, Zhejiang University School of Medicine, Hangzhou,  
34 Zhejiang, China

35 #, co-first authors

36 \*, corresponding author. Tong Liu: [liutong@hrbmu.edu.cn](mailto:liutong@hrbmu.edu.cn); Chunhui Yuan:

37 [yuanchunhui@westlake.edu.cn](mailto:yuanchunhui@westlake.edu.cn); Tiannan Guo: [guotiannan@westlake.edu.cn](mailto:guotiannan@westlake.edu.cn)

38

39

40 Running title: Optimization of Spectral Library Size for DIA

41 Keywords: Data-independent acquisition; protein identification; Pan-human library; Spectral  
42 library optimization.

43

## 44 **Abstract**

45       Efficient peptide and protein identification from data-independent acquisition mass  
46 spectrometric (DIA-MS) data typically rely on an experiment-specific spectral library with a  
47 suitable size. Here, we report a computational strategy for optimizing the spectral library for a  
48 specific DIA dataset based on a comprehensive spectral library, which is accomplished by *a*  
49 *priori* analysis of the DIA dataset. This strategy achieved up to 44.7% increase in peptide  
50 identification and 38.1% increase in protein identification in the test dataset of six colorectal  
51 tumor samples compared with the comprehensive pan-human library strategy. We further applied  
52 this strategy to 389 carcinoma samples from 15 tumor datasets and observed up to 39.2%  
53 increase in peptide identification and 19.0% increase in protein identification. In summary, we  
54 present a computational strategy for spectral library size optimization to achieve deeper  
55 proteome coverage of DIA-MS data.

56

## 57 **Introduction**

58       Data-independent acquisition mass spectrometry (DIA-MS) based proteomics coupled with  
59 targeted data analysis is playing an increasing role in biomedical studies (1), owing to its high  
60 degree of reproducibility, quantitative accuracy, and high throughput (2, 3). Both spectral  
61 library-free and library-based strategies are being applied to analyze DIA-MS data (4). While the  
62 library-free strategies (5, 6) could identify peptides directly from DIA-MS itself without the  
63 requirement of an external spectral library, the depth of proteomic coverage is limited at the  
64 moment (7-9). The more widely adopted strategy is based on building a spectral library using the

65 corresponding data-dependent acquisition mass spectrometry (DDA-MS) datasets of the samples  
66 of interest (10), or a pre-built library from public data repositories (11-14).

67 The size of the spectral library has a direct impact on the performance of DIA-MS data  
68 analysis (15). A larger number of DDA-MS runs, particularly from fractionated samples, leads to  
69 a more comprehensive spectral library enabling potential detection of a larger number of  
70 peptides and proteins from the DIA-MS datasets (15). However, it also generates a larger search  
71 space and reduces the statistical power to detect true positives (16, 17). Extra concerns are raised  
72 where the proteins and peptides within the library may not be specific to a particular specimen,  
73 potentially introducing more false positives (18). Other drawbacks include the prolonged  
74 computational time which is approximately linearly correlated with the size of the library (19),  
75 and distortion of retention time (RT) distribution for alignment (20).

76 The spectral library size could be optimized to improve DIA-MS performance. The Van  
77 Eyk group have reported that applying a comprehensive fractionated library led to higher number  
78 of protein/peptide identifications from DIA-MS datasets than un-fractionated libraries with  
79 limited sizes (15). Similar results have been reported by Uszkoreit group, where they found  
80 larger library led to higher peptide and protein identification but the increase was minimal when  
81 the library is comprehensive enough (21). The combination of an in-house built library with  
82 external libraries from public data improves DIA data analysis performance (17). Inclusion of  
83 internal library extracted from DIA files also improved peptide and protein identification (9). On  
84 the other hand, it has also been observed that libraries of very large size led to higher FDRs in  
85 the DIA-MS analyses and hence compromises the identification results (17). It was further  
86 demonstrated that, even within the same spectral library, controlling the confidence of peptide  
87 identifications to exclude redundant peptides could improve peptide and protein identification

88 results (16). Although these studies have repetively reported the importance of the size of  
89 spectral library size, a systematic evaluation and optimization of library size is still lacking.

90 Here, we propose a two-step strategy called subLib to generate the experiment-specific  
91 subset libraries using *a priori* analysis of the DIA data to improve the proteomic coverage. The  
92 strategy to derive a subset library of optimal size was further applied to analyze the DIA data of  
93 15 human tumors.

94

## 95 **Materials and Methods**

### 96 **Colorectal cancer dataset**

97 To evaluate our strategy, the DIA-MS datasets were collected from a colorectal cancer  
98 proteomic project in our group (Xiang *et al.*, manuscript in preparation). Briefly, 286 FFPE  
99 samples from 44 colorectal cancer patients were processed into peptides with a pressure cycling  
100 technology (PCT)-based protocol as described in the previous study (22). They were subjected to  
101 data acquisition on the nanoflow EASY-nLC™ 1200 System coupled with Q Exactive HF  
102 hybrid Quadrupole-Orbitrap in DIA mode over a gradient of 60 min using 24 DIA windows  
103 spanning from 400 Da to 1200 Da.

### 104 **Fifteen datasets of multiple tumor types**

105 A total of 389 tumor tissue samples from 15 tumor types were collected. The gastric  
106 carcinoma (n=30) and thyroid carcinoma (n=30) samples were collected from the First Affiliated  
107 Hospital College of Medicine, Zhejiang University. The prostate carcinoma (n=30) and bone  
108 carcinoma (n=30) samples were collected from the Second Affiliated Hospital College of

109 Medicine, Zhejiang University. The liver carcinoma (n=33) and leukemia (n=27) samples were  
110 collected from Wuhan Union Hospital. The ovarian carcinoma (n=30) samples were collected  
111 from Zhejiang Cancer Hospital. The cervical carcinoma (n=28) samples were collected from  
112 Shengjing Hospital of China Medical University. The lung adenocarcinoma (n=32), gallbladder  
113 carcinoma (n=20), pancreatic adenocarcinoma (n=20), myosarcoma (n=19), clear cell renal cell  
114 carcinoma (CCRCC, n=20), diffuse large B-cell lymphoma (DLBCL, n=19), and papillary  
115 thyroid cancer (PTC, n=21) were collected from Harbin Medical University Cancer Hospital. All  
116 samples were approved by the ethics committees of their respective hospitals. The tissue samples  
117 were prepared with PCT-based tissue lysis and protein digestion protocol (22) and analyzed by  
118 DIA-MS, as listed in Table S1. Ethics approvals for this study were obtained from the Ethics  
119 Committee or Institutional Review.

## 120 **Proteomic data analysis workflow**

121 The raw DIA-MS data files were converted to mzXML format using the msConvert tool in  
122 ProteomeWizard (23). The DIA-MS datasets were analyzed using the open-source software  
123 OpenSWATH (version 2.4.0) (24) with the following criteria: common internal reference  
124 peptides (CiRTs) of each tissue were applied respectively for retention time alignment; m/z  
125 extraction window was set to 30 ppm, and RT extraction window was set between 200-800  
126 seconds, depending on different gradients of the DIA-MS module (Table S1). PyProphet (version  
127 2.1.3) (24) was used for statistical validation via setting the global cutoff of FDR as 0.01 at both  
128 peptide and protein levels. Protein inference was performed as described previously (25). Unless  
129 otherwise mentioned, the software parameters were kept the same for all the analyses in this  
130 study.

## 131 **Subset library generation**

132 We proposed a two-step strategy to take a subset of the spectral library. Firstly, the public  
133 library is taken to analyze the candidate DIA-MS dataset using the OpenSWATH workflow.  
134 Different FDR cutoffs were set to generate a list of identification results. Afterwards, they were  
135 matched against the public library to generate experiment-specific subset libraries.

136 In this study, we set the DIA Pan-Human Library (DPHL) (12) as the baseline library to  
137 analyze the colorectal cancer dataset containing 284 DIA-MS data files. FDR cutoffs were set at  
138 0.01, 0.02, 0.03, 0.04, 0.05, 0.06, 0.07, 0.08, 0.09, 0.1, 0.2, 0.3, 0.4, 0.5 and 0.6 (n=15), to  
139 generate 15 identification results. After matching with DPHL, OpenSwathDecoyGenerator.exe in  
140 OpenMS (version2.4.0) was applied to generate equal amount of decoys in mutated fashion. The  
141 resultant subset library is a combination of DPHL subsets and decoys.

142

## 143 **Results and Discussions**

### 144 **Generation of the subset library by refining DPHL**

145 For data comprehensiveness and accessibility, DPHL built from 16 human tissue types  
146 containing 359,627 peptide precursors and 14,782 protein groups was used as the baseline  
147 spectral library. A DIA-MS dataset of 286 colorectal cancer sample cohort was analyzed to  
148 derive the initial identifications. We set the FDR cut-off for peptide precursor and protein  
149 identification to 0.01, 0.02, 0.03, 0.04, 0.05, 0.06, 0.07, 0.08, 0.09, 0.1, 0.2, 0.3, 0.4, 0.5 and 0.6  
150 (a total of 15 tests), then retrieved the resultant subset libraries at each FDR cutoff. The four  
151 representative DIA-MS data files (sample A1-A4) within the cohort and two external colorectal  
152 cancer DIA-MS data files (sample B1 and B2) were taken to evaluate the identification  
153 performance of each subset library (Figure 1A). The number of identified peptides shows a

154 generally decreasing trend as the FDR cutoff increases (Figure 1C), with the exceptions when  
155 FDR increases from 0.01 to 0.02, and from 0.04 to 0.05. The number of identified proteins  
156 increased as the FDR cut-off increased from 0.01 to 0.05, and gradually decreased afterward,  
157 with a drastic decline when the cutoff was beyond 0.1 (Figure 1D). This is not unexpected since  
158 the peptides identified with high FDR are more likely absent in the sample at the detection limit.  
159 As the library size increased, the negative effect prevailed. The best result was obtained from the  
160 library with a FDR cutoff of 0.05. The optimal library was composed of 85,655 peptide  
161 precursors, 62,390 peptides, and 6,448 protein groups, leading to the identification of 29,979  
162 peptide precursors and 4,418 protein groups, respectively. This optimized library led to 44.7%  
163 and 38.1% increase of peptide precursors and protein groups, respectively, compared with the  
164 results by the unfiltered DPHL (Figure S1). The subset library with the FDR cutoff of 0.05 was  
165 the best subset library which was hence adopted for further evaluation. The DIA files used for  
166 library size optimization from samples A1-A4 led to similar data to those from independent  
167 samples (B1 and B2), suggesting that the library size optimization is generic and applicable to  
168 DIA files of the same tissue type.

### 169 **Adding unidentified peptide precursors to the subset library sacrificed identification**

170 To check if unidentified peptide precursors in a spectral library would affect the DIA-MS  
171 proteome coverage, we randomly generated nine sets of DPHL peptides that were excluded from  
172 the subset library (defined as “unidentified peptides”), with precursor number equivalent to n%  
173 of the subset library (n=10, 20, ..., 90), and combined them with the subset library peptides  
174 (Figure 1B). When applying the reconstructed spectral libraries to analyze the test DIA dataset, a  
175 steady decrease of identified peptides and proteins was observed as more unidentified precursors



176 were included (Figure 1E, F), with the highest proteome coverage coming from the library with  
177 no unidentified peptides, summing up to 29,712 peptide precursors and 4,433 protein groups.

178 We also replaced the unidentified peptides to *in silico* generated decoy peptides and  
179 repeated the above analyses. Peptide/protein identifications decreased as the computational  
180 peptide proportions increase from 0% to 60%. Further addition of decoys would, however, subtly  
181 increase protein identifications (Figure 1G, H). The highest proteome coverage came from the  
182 library with no decoy interferences, summing up to 19,322 peptide precursors and 3,461 protein  
183 groups. We hence concluded that any false positive interference in the library would suppress the  
184 peptide/protein identification.

#### 185 **Adding subset library peptides to interferences improves identification**

186 We then conducted a backward analysis by adding increasing proportions of subset library  
187 peptides to the unidentified peptides (Figure 1B). The spectral library composed by precursors of  
188 unidentified peptides solely (n=0) could not identify any peptide or protein in the DIA-MS data.  
189 The numbers of identification of peptides and proteins exhibited almost marked increase as n  
190 increased (Figure 1I, K). Together with the above results, they validated the effectiveness of  
191 setting FDR cutoff as 0.05 to eliminate false positive targets.

#### 192 **Applying subLib to DIA-MS of 15 tumor sample types**

193 We named the library generation strategy “subLib” and further applied it to the fifteen DIA  
194 datasets of different types of cancer samples, including bone, cervical, DLBCL, gallbladder,  
195 gastric, leukemia, liver, lung, myosarcoma, ovarian, pancreatic, prostate, PTC, and CCRCC  
196 (Figure 2A). Peptide/protein identifications using the subset library exceeded that from using  
197 DPHL in most cases (Figure 3A), and over 99% of the protein identifications were overlapped in

198 every cancer type (Figure S2). We collectively found that the subLib strategy outperformed the  
199 DPHL strategy in all cancer types, with the most prominent increase from PTC carcinoma  
200 samples (19.02% increase in protein groups and 36.17% increase in peptide precursors, Figure  
201 2B). Of note, the discrimination ability to separate the targets from decoys led to a marked  
202 increase (Figure 2C), further validating that the subLib strategy can reduce false positives in  
203 clinical proteomic data. Missing values were equivalent between DPHL and the subLib strategy  
204 (Figure 3B), and the protein quantification results were in good accordance as well with Pearson  
205 correlation ratios all over 0.92 across all the tumor tissue types (Figure 3B), suggesting that  
206 decreasing library sizes by adjusting FDR values does not impair protein identification nor  
207 quantification. Moreover, different tumor types could be well resolved using the thus generated  
208 protein matrix (Figure 2D). These results indicate that this subLib strategy could be generically  
209 used for DIA data generated from different samples.

## 210 **Concluding remarks**

211 In this study, we present a computational strategy to optimize library size for DIA data  
212 analysis. In our DIA data of human tissue specimens, setting FDR to 0.05 enabled effective  
213 spectral library subsetting. The application of this strategy to DIA data from 15 tumor types  
214 further consolidated this conclusion. This subLib strategy reduced false positive identifications,  
215 increased peptide and protein identifications, and generated protein data matrix quantitatively  
216 comparable to the DIA analysis with unfiltered library. In conclusion, the subLib strategy for  
217 DIA spectral library size optimization boosts proteome identifications of DIA-MS data.

218

## 219 **Acknowledgements**

220 This work is supported by grants from National Key R&D Program of China (No.  
221 2020YFE0202200), the National Natural Science Foundation of China (81972492, 21904107),  
222 Zhejiang Provincial Natural Science Foundation for Distinguished Young Scholars  
223 (LR19C050001), Hangzhou Agriculture and Society Advancement Program (20190101A04),  
224 and Westlake Education Foundation. We thank Westlake University Supercomputer Center for  
225 assistance in data storage and computation.

226

### 227 **Conflict of interest statement**

228 The research group of Tiannan Guo is partly supported by Pressure Biosciences Inc, which  
229 provided access to advanced sample preparation instrumentation. T.G is shareholder of Westlake  
230 Omics Inc. W.G. is employee of Westlake Omics Inc. The remaining authors declare no  
231 competing interests.

232

### 233 **Data Availability**

234 The raw data and peptide/protein matrixes were deposited in ProteomeXchange Consortium  
235 (<https://www.iprox.org/>). Project ID: IPX0002439000 and IPX0001981000.

236

### 237 **References**

- 238 1. Yue, L., Zhang, F., Sun, R., Sun, Y., Yuan, C., Zhu, Y., and Guo, T. (2020) Generating Proteomic  
239 Big Data for Precision Medicine. *PROTEOMICS* n/a, 1900358
- 240 2. Gillet, L. C., Navarro, P., Tate, S., Rost, H., Selevsek, N., Reiter, L., Bonner, R., and Aebersold, R.  
241 (2012) Targeted data extraction of the MS/MS spectra generated by data-independent acquisition: a  
242 new concept for consistent and accurate proteome analysis. *Mol Cell Proteomics* 11, O111 016717
- 243 3. Guo, T., Kouvonen, P., Koh, C. C., Gillet, L. C., Wolski, W. E., Rost, H. L., Rosenberger, G.,  
244 Collins, B. C., Blum, L. C., Gillessen, S., Joerger, M., Jochum, W., and Aebersold, R. (2015) Rapid  
245 mass spectrometric conversion of tissue biopsy samples into permanent quantitative digital proteome  
246 maps. *Nat Med* 21, 407-413

- 247 4. Zhang, F., Ge, W., Ruan, G., Cai, X., and Guo, T. (2020) Data-Independent Acquisition Mass  
248 Spectrometry-Based Proteomics and Software Tools: A Glimpse in 2020. *PROTEOMICS* 20,  
249 1900276
- 250 5. Tsou, C. C., Avtonomov, D., Larsen, B., Tucholska, M., Choi, H., Gingras, A. C., and Nesvizhskii,  
251 A. I. (2015) DIA-Umpire: comprehensive computational framework for data-independent acquisition  
252 proteomics. *Nat Methods* 12, 258+
- 253 6. Demichev, V., Messner, C. B., Vernardis, S. I., Lilley, K. S., and Ralser, M. (2020) DIA-NN: neural  
254 networks and interference correction enable deep proteome coverage in high throughput. *Nat*  
255 *Methods* 17, 41+
- 256 7. Muntel, J., Gandhi, T., Verbeke, L., Bernhardt, O. M., Treiber, T., Bruderer, R., and Reiter, L. (2019)  
257 Surpassing 10 000 identified and quantified proteins in a single run by optimizing current LC-MS  
258 instrumentation and data analysis strategy. *Mol Omics* 15, 348-360
- 259 8. Cho, K. C., Clark, D. J., Schnaubelt, M., Teo, G. C., Leprevost, F. D. V., Bocik, W., Boja, E. S.,  
260 Hiltke, T., Nesvizhskii, A. I., and Zhang, H. (2020) Deep Proteomics Using Two Dimensional Data  
261 Independent Acquisition Mass Spectrometry. *Anal Chem* 92, 4217-4225
- 262 9. Zhong, C. Q., Wu, R., Chen, X., Wu, S., Shuai, J., and Han, J. (2020) Systematic Assessment of the  
263 Effect of Internal Library in Targeted Analysis of SWATH-MS. *J Proteome Res* 19, 477-492
- 264 10. Schubert, O. T., Gillet, L. C., Collins, B. C., Navarro, P., Rosenberger, G., Wolski, W. E., Lam, H.,  
265 Amodei, D., Mallick, P., MacLean, B., and Aebersold, R. (2015) Building high-quality assay libraries  
266 for targeted analysis of SWATH MS data. *Nature Protocols* 10, 426-441
- 267 11. Rosenberger, G., Koh, C. C., Guo, T., Rost, H. L., Kouvonen, P., Collins, B. C., Heusel, M., Liu, Y.,  
268 Caron, E., Vichalkovski, A., Faini, M., Schubert, O. T., Faridi, P., Ebhardt, H. A., Matondo, M.,  
269 Lam, H., Bader, S. L., Campbell, D. S., Deutsch, E. W., Moritz, R. L., Tate, S., and Aebersold, R.  
270 (2014) A repository of assays to quantify 10,000 human proteins by SWATH-MS. *Sci Data* 1,  
271 140031
- 272 12. Zhu, T., Zhu, Y., Xuan, Y., Gao, H., Cai, X., Piersma, S. R., Pham, T. V., Schelfhorst, T., Haas, R. R.  
273 G. D., Bijnsdorp, I. V., Sun, R., Yue, L., Ruan, G., Zhang, Q., Hu, M., Zhou, Y., Van Houdt, W. J.,  
274 Lelarge, T. Y. S., Cloos, J., Wojtuszkiewicz, A., Koppers-Lalic, D., Böttger, F., Scheepbouwer, C.,  
275 Brakenhoff, R. H., van Leenders, G. J. L. H., Ijzermans, J. N. M., Martens, J. W. M., Steenbergen, R.  
276 D. M., Grieken, N. C., Selvarajan, S., Mantoo, S., Lee, S. S., Yeow, S. J. Y., Alkaff, S. M. F., Xiang,  
277 N., Sun, Y., Yi, X., Dai, S., Liu, W., Lu, T., Wu, Z., Liang, X., Wang, M., Shao, Y., Zheng, X., Xu,  
278 K., Yang, Q., Meng, Y., Lu, C., Zhu, J., Zheng, J. e., Wang, B., Lou, S., Dai, Y., Xu, C., Yu, C.,  
279 Ying, H., Lim, T. K., Wu, J., Gao, X., Luan, Z., Teng, X., Wu, P., Huang, S. a., Tao, Z., Iyer, N. G.,  
280 Zhou, S., Shao, W., Lam, H., Ma, D., Ji, J., Kon, O. L., Zheng, S., Aebersold, R., Jimenez, C. R., and  
281 Guo, T. (2020) DPHL: A DIA Pan-human Protein Mass Spectrometry Library for Robust Biomarker  
282 Discovery. *Genomics, Proteomics & Bioinformatics*
- 283 13. Blattmann, P., Stutz, V., Lizzo, G., Richard, J., Gut, P., and Aebersold, R. (2019) Generation of a  
284 zebrafish SWATH-MS spectral library to quantify 10,000 proteins. *Scientific Data* 6, 190011
- 285 14. Zhang, H., Liu, P., Guo, T., Zhao, H., Bensaddek, D., Aebersold, R., and Xiong, L. (2019)  
286 Arabidopsis proteome and the mass spectral assay library. *Sci Data* 6, 278
- 287 15. Parker, S. J., Venkatraman, V., and Van Eyk, J. E. (2016) Effect of peptide assay library size and  
288 composition in targeted data-independent acquisition-MS analyses. *Proteomics* 16, 2221-2237
- 289 16. Zi, J., Zhang, S., Zhou, R., Zhou, B., Xu, S., Hou, G., Tan, F., Wen, B., Wang, Q., Lin, L., and Liu,  
290 S. (2014) Expansion of the ion library for mining SWATH-MS data through fractionation  
291 proteomics. *Anal Chem* 86, 7242-7246
- 292 17. Wu, J. X., Song, X., Pascovici, D., Zaw, T., Care, N., Krisp, C., and Molloy, M. P. (2016) SWATH  
293 Mass Spectrometry Performance Using Extended Peptide MS/MS Assay Libraries. *Mol Cell*  
294 *Proteomics* 15, 2501-2514
- 295 18. Rosenberger, G., Bludau, I., Schmitt, U., Heusel, M., Hunter, C. L., Liu, Y., MacCoss, M. J.,  
296 MacLean, B. X., Nesvizhskii, A. I., Pedrioli, P. G. A., Reiter, L., Rost, H. L., Tate, S., Ting, Y. S.,

- 297 Collins, B. C., and Aebersold, R. (2017) Statistical control of peptide and protein error rates in large-  
298 scale targeted data-independent acquisition analyses. *Nat Methods* 14, 921-927
- 299 19. Teleman, J., Hauri, S., and Malmstrom, J. (2017) Improvements in Mass Spectrometry Assay Library  
300 Generation for Targeted Proteomics. *J Proteome Res* 16, 2384-2392
- 301 20. Escher, C., Reiter, L., MacLean, B., Ossola, R., Herzog, F., Chilton, J., MacCoss, M. J., and Rinner,  
302 O. (2012) Using iRT, a normalized retention time for more targeted measurement of peptides.  
303 *Proteomics* 12, 1111-1121
- 304 21. Barkovits, K., Pacharra, S., Pfeiffer, K., Steinbach, S., Eisenacher, M., Marcus, K., and Uszkoreit, J.  
305 (2020) Reproducibility, Specificity and Accuracy of Relative Quantification Using Spectral Library-  
306 based Data-independent Acquisition. *Molecular & Cellular Proteomics* 19, 181-197
- 307 22. Zhu, Y., and Guo, T. (2018) High-Throughput Proteomic Analysis of Fresh-Frozen Biopsy Tissue  
308 Samples Using Pressure Cycling Technology Coupled with SWATH Mass Spectrometry. In: Sarwal,  
309 M. M., and Sigdel, T. K., eds. *Tissue Proteomics: Methods and Protocols*, pp. 279-287, Springer  
310 New York, New York, NY
- 311 23. Adusumilli, R., and Mallick, P. (2017) Data Conversion with ProteoWizard msConvert. *Methods Mol*  
312 *Biol* 1550, 339-368
- 313 24. Rost, H. L., Rosenberger, G., Navarro, P., Gillet, L., Miladinovic, S. M., Schubert, O. T., Wolski, W.,  
314 Collins, B. C., Malmstrom, J., Malmstrom, L., and Aebersold, R. (2014) OpenSWATH enables  
315 automated, targeted analysis of data-independent acquisition MS data. *Nat Biotechnol* 32, 219-223
- 316 25. Gao, H., Zhang, F., Liang, S., Zhang, Q., Lyu, M., Qian, L., Liu, W., Ge, W., Chen, C., Yi, X., Zhu,  
317 J., Lu, C., Sun, P., Liu, K., Zhu, Y., and Guo, T. (2020) Accelerated Lysis and Proteolytic Digestion  
318 of Biopsy-level Fresh Frozen and FFPE Tissue Samples Using Pressure Cycling Technology. *J*  
319 *Proteome Res*

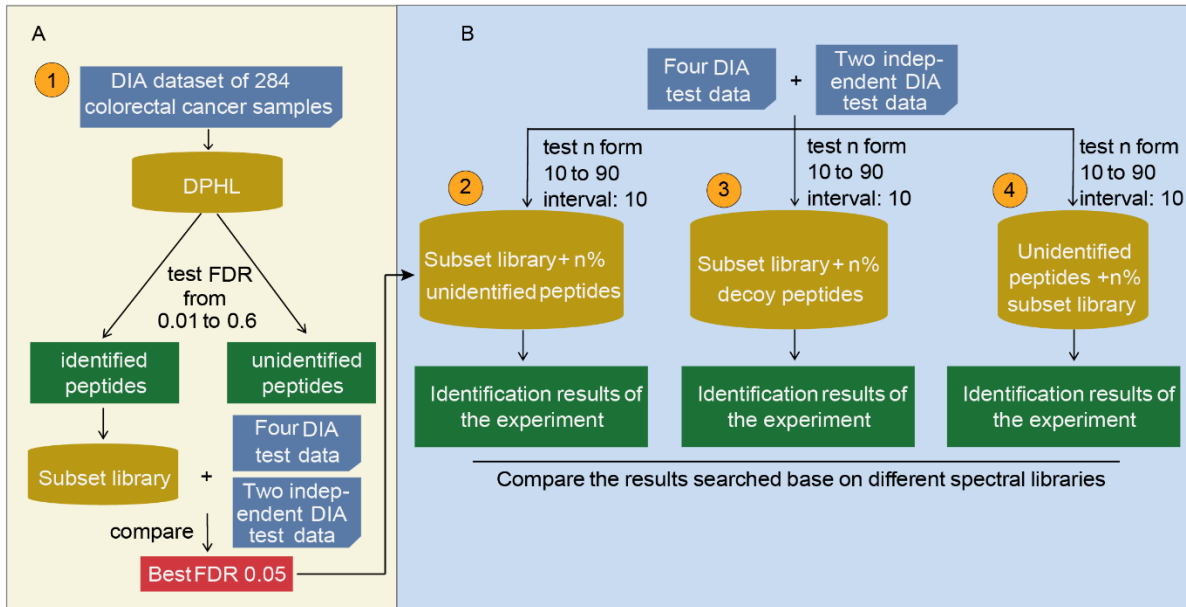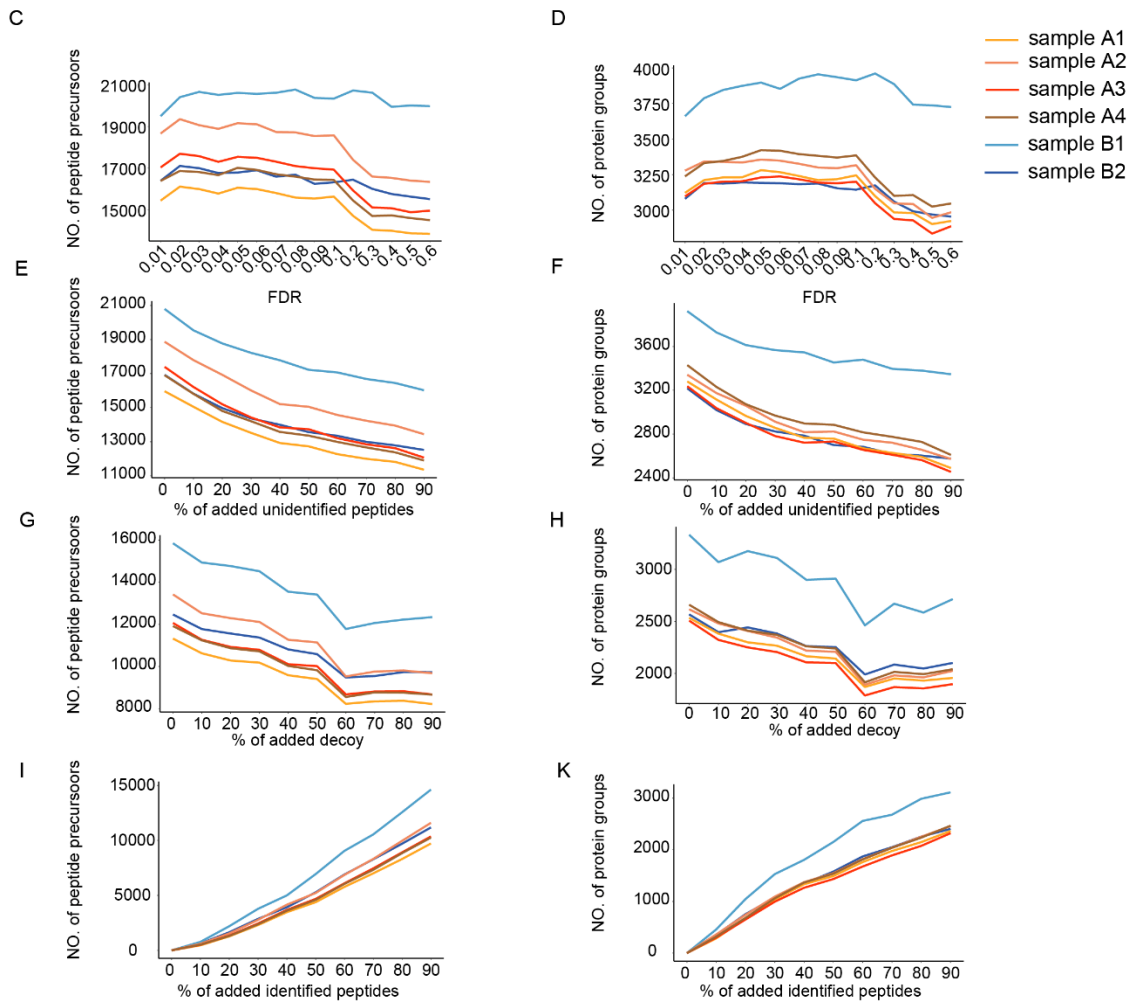

321 **Figure 1. Optimizing DPHL in the DIA dataset of colorectal cancer.** (A) The workflow of  
322 spectral library optimization. Step 1: Select the best FDR for refining the subset library from the  
323 public DPHL library. The subset library refined from DPHL with FDR of 0.05 is considered as  
324 the optimal subset library, which was used as a primary optimized subset spectral library in this  
325 study. Step 2: Evaluate the performance of the spectral library consisting of the subset library  
326 and n% unidentified peptides. Step 3: Evaluate the performance of spectral library consisting of  
327 subset library and n% decoy peptides. Step 4: Evaluate the performance of spectral library  
328 consisting of unidentified peptides and n% peptides from the subset library. By comparing all the  
329 identification results, the subset library refined from DPHL with FDR of 0.05 is the best  
330 experiment-specific spectral library for DIA data analysis. The numbers of identified peptides  
331 (C) and proteins (D) based on the subset libraries which were refined from DPHL at nine  
332 different FDRs. The numbers of identified peptides (E) and proteins (F) based on the spectral  
333 libraries consisting of subset library and n% unidentified peptides. The numbers of identified  
334 peptides (G) and proteins (H) based on the spectral libraries consisting of the subset library and  
335 n% decoy peptides. The numbers of identified peptides (I) and proteins (K) based on the spectral  
336 libraries consisting of unidentified peptides and n% peptides from the subset library.

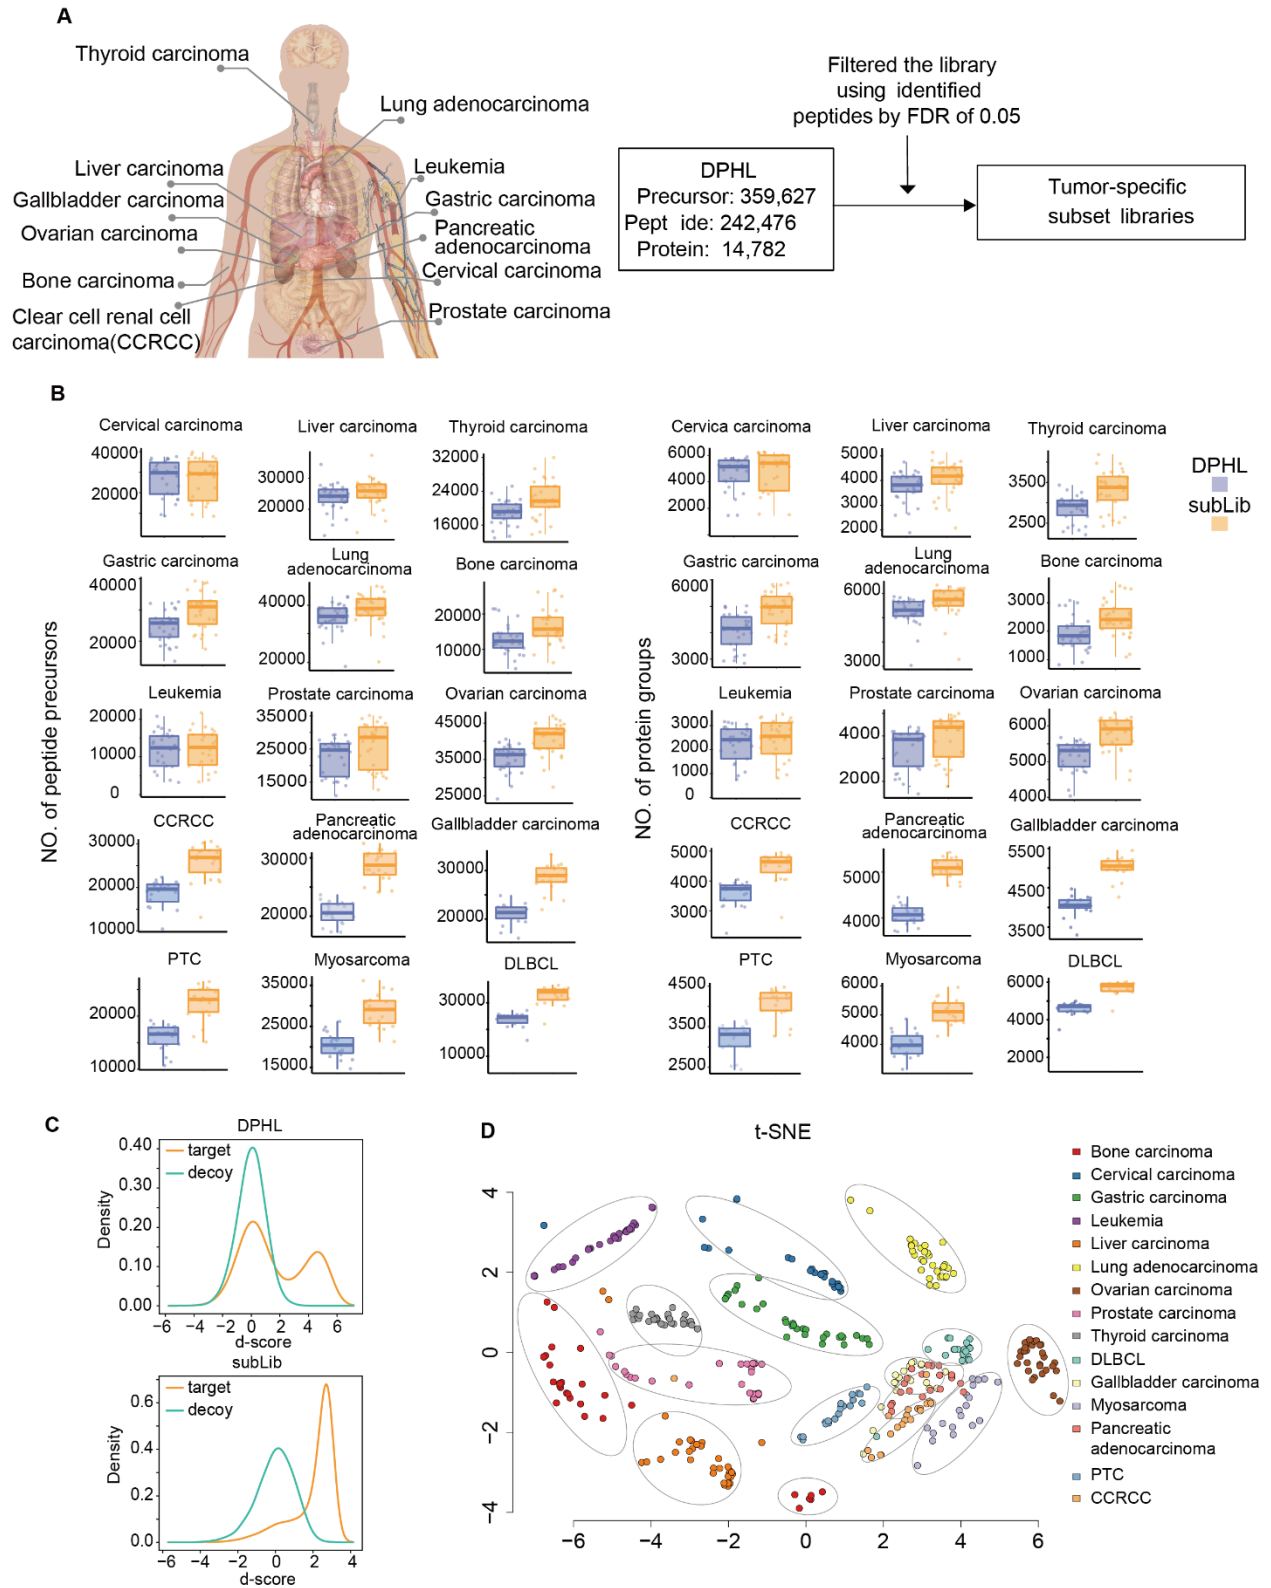



338 **Figure 2. Tumor-specific subset library improves the identifications compared with DPHL.**

339 (A) The workflow of the subLib strategy. (B) The number of peptides and proteins identified  
340 base on tumor-specific subLib and DPHL in 15 tumor types. (C) The distribution of  
341 discrimination score (d-score) of the target and decoy of the subset library and DPHL. (D) The  
342 tSNE plot shows the samples are well resolved by tissue type.

343

A

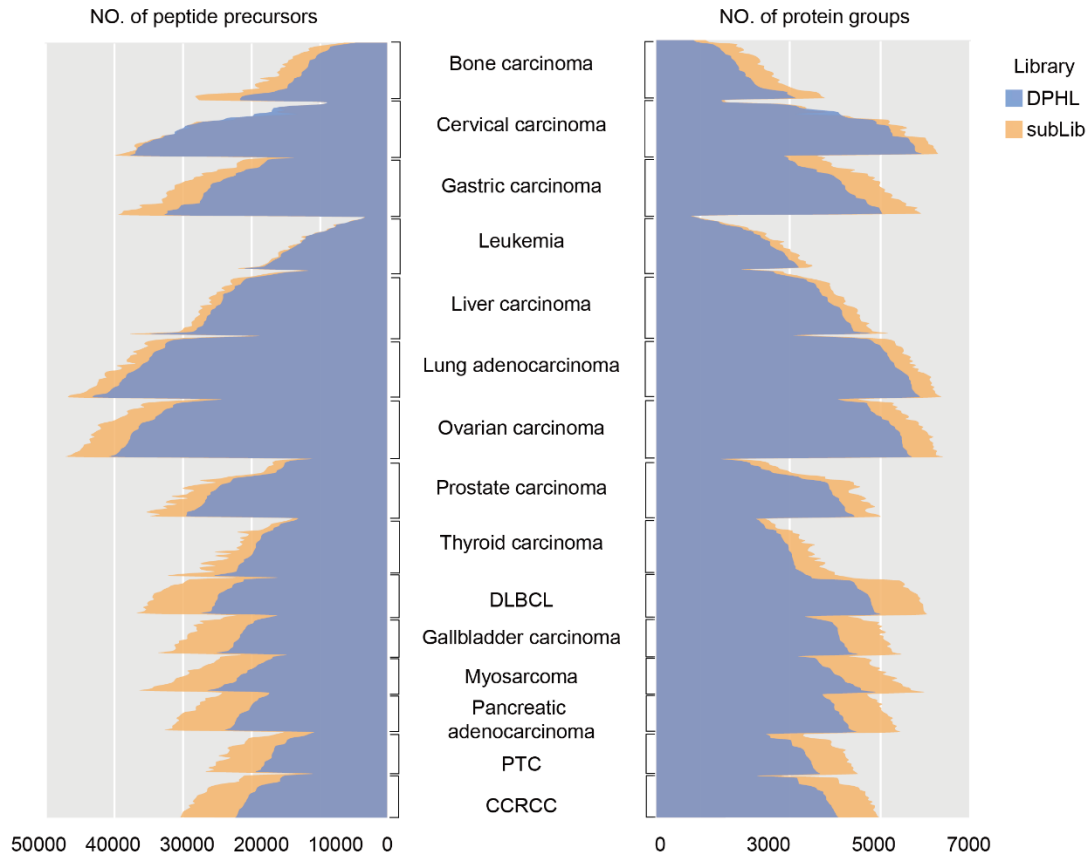

B

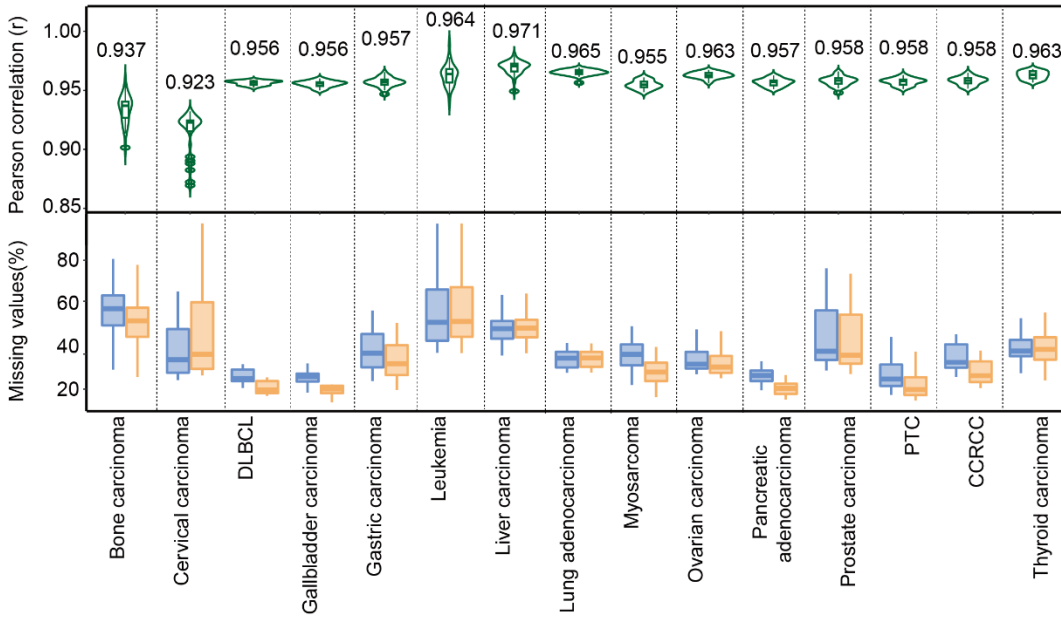

344

345 **Figure 3. Peptide precursor and protein identification using the optimized subset library**  
346 **and DPHL.** (A) The number of peptide precursors and protein groups identified using the  
347 optimized subset library and DPHL for each sample of every tumor type. subLib, the optimized  
348 subset library. Protein identifications were shown on the right, and peptide precursor  
349 identifications were shown on the left. (B) The correlation values on the protein level between  
350 identification results of the optimized subset library and DPHL. The percentages of protein  
351 missing values identified base on DPHL and the optimized library of each tumor type.  
352

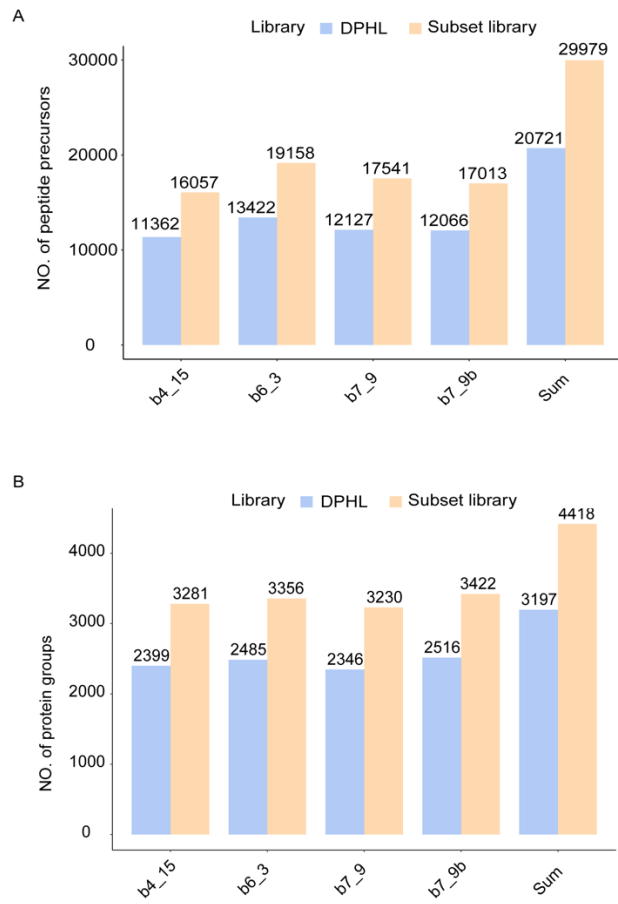

353

354 **Figure S1. Identification results of the four representative DIA-MS data in the colorectal**  
355 **cancer cohort.**

356

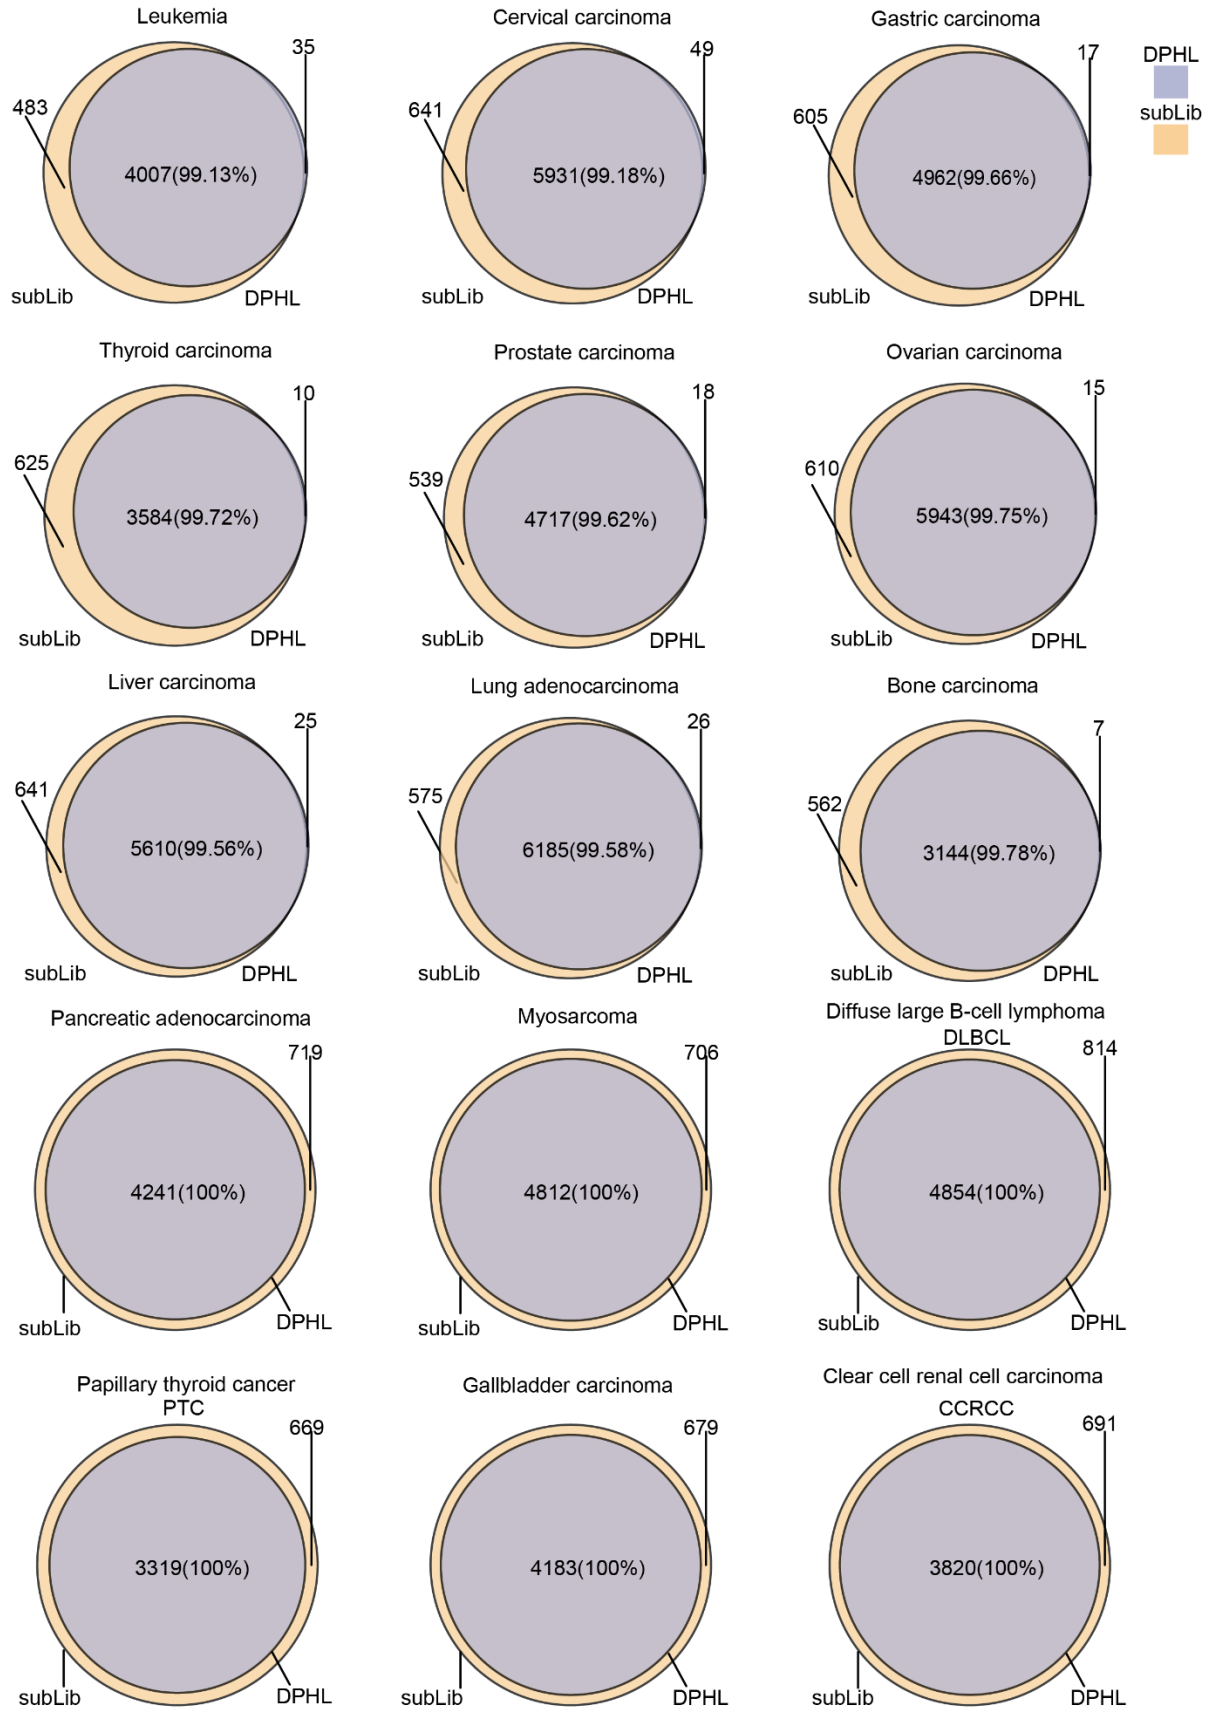

358 **Figure S2. Venn diagrams showing overlap of protein identifications between the optimized**  
359 **subset library and DPHL.**

360
